# Supplementary material
Source: PubMed Central journal article supplement (PMC2965551)
Supplement: supp_tpc.110.078154_SupplementalTable1.pdf [file supp_tpc.110.078154_SupplementalTable1.pdf]

Supplemental Table 1 A Partial List of Genes Involved in Arabidopsis Protein Quality Control.

| Process involved          | Gene name  | Accession number | Reference                |
|---------------------------|------------|------------------|--------------------------|
| Chaperones                | AtBiP1     | At5g28540        | Liu et al., 2007a        |
|                           | AtBiP2     | At5g42020        | Liu et al., 2007a        |
|                           | AtBiP3     | At1g09080        | Liu et al., 2007a        |
|                           | SHEPHERD   | At4g24190        | Klein et al., 2006       |
| Co-chaperones             | AtJ1       | At1g28210        | Schlenstedt et al., 1995 |
|                           | AtJ2       | At5g22060        | Schlenstedt et al., 1995 |
|                           | AtJ3       | At3g44110        | Schlenstedt et al., 1995 |
|                           | TMS1       | At3g08970        | Yang et al., 2009        |
| N-glycosylation           | AtDAD1     | At1g32210        | Gallois et al., 1997     |
|                           | AtDAD2     | At2g35520        | Gallois et al., 1997     |
|                           | AtSTT3A    | At5g19690        | Koiwa et al., 2003       |
|                           | AtSTT3B    | At1g34130        | Koiwa et al., 2003       |
|                           | DGL1-1     | At5g66680        | Lerouxel et al., 2005    |
|                           | HAP6       | At4g21150        | Lerouxel et al., 2005    |
| Dolichol biosynthesis     | LEW1       | At1g11755        | Zhang et al., 2008       |
| Disulfide bond formation  | AtPDIL1-1  | At1g21750,       | Lu and Christopher, 2008 |
|                           | AtPDIL1-2  | At1g77510,       | Lu and Christopher, 2008 |
|                           | AtPDIL1-3  | At3g54960        | Lu and Christopher, 2008 |
|                           | AtPDIL1-4  | At5g60640        | Lu and Christopher, 2008 |
|                           | AtPDIL1-5  | At1g52260        | Lu and Christopher, 2008 |
|                           | AtPDIL1-6  | At3g16110        | Lu and Christopher, 2008 |
|                           | Aero1      | At1g72280        | Dixon et al., 2003       |
|                           | Areo2      | At2g38960        | Dixon et al., 2003       |
| Lectins                   | CRT1       | At1g56340        | Jia et al., 2009         |
|                           | CRT2       | At1g09210        | Jia et al., 2009         |
|                           | CNX1       | At5g61790        | Hong et al., 2008        |
|                           | CNX2       | At5g07340        | Hong et al., 2008        |
|                           | UGGT       | At1g71220        | Jin et al., 2007         |
| Unfolded protein response | IRE1a      | At2g17520,       | Koizumi et al., 2001     |
|                           | IRE1b      | At5g24360        | Koizumi et al., 2001     |
|                           | AtbZIP17   | At2g40950        | Liu et al., 2007b        |
|                           | AtbZIP28   | At3g10800        | Liu et al., 2007a        |
|                           | AtbZIP60   | At1g42990        | Iwata et al., 2008       |
|                           | AtS1P      | At5g19660        | Liu et al., 2007b        |
|                           | AtS2P      | At4g20310        | Liu et al., 2007b        |
|                           | AtNF-YA4   | At2g34720        | Liu and Howell, 2010     |
|                           | AtNF-YB3   | At4g14540        | Liu and Howell, 2010     |
|                           | AtNFYC2    | At1g56170        | Liu and Howell, 2010     |
| Apoptosis                 | G $\alpha$ | At2g26300        | Wang et al., 2007        |
|                           | G $\beta$  | At4g34460        | Wang et al., 2007        |
|                           | AtBAG4     | At3g51780        | Doukhanina et al., 2006  |
|                           | AtBAG7     | At5g62390        | Williams et al., 2010    |
|                           | AtBI1-1    | At5g47120        | Watanabe and Lam, 2008   |
|                           | AtMC8      | At1g16420        | He et al., 2008          |
